# Supplementary material
Source: publisher figshare collection journal article supplement (https://sage.figshare.com/ndownloader/files/15592547)

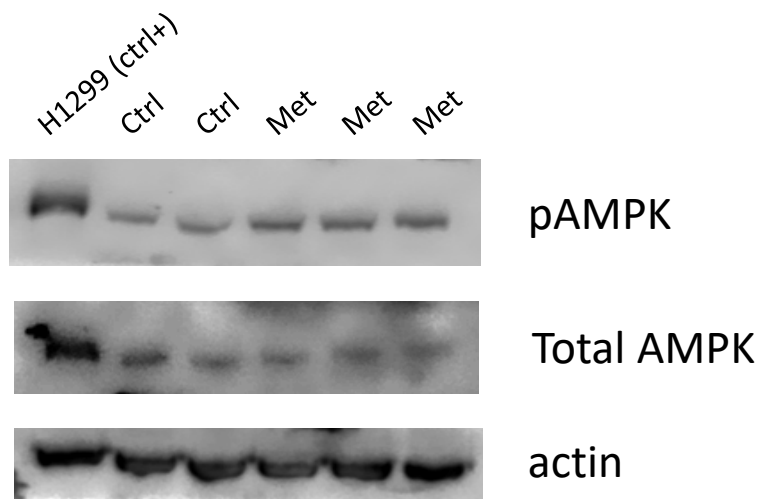

**Supplementary Figure 4. In vivo AMPK activation.**

Supplement: Supplementary file 1 [file 15592547]
